# Supplementary material for: Exciting Complexity: The Role of Motor Circuit Elements in ALS Pathophysiology
Source: PubMed Central journal article supplement (PMC7311855; doi:10.3389/fnins.2020.00573), 2020-06-17
Supplement: Table_1.pdf [file Table_1.pdf]

**Supplementary Table 1.** Key characteristics of commonly used mouse models of ALS (excluding C9orf72 repeat expansion models). Abbreviations: Alsin<sup>KO</sup>, Alsin knockout; FUS, fused in sarcoma; hPFN1, human profilin 1; LMN, lower motor neurons; n.a., not applicable; n.s., not specified; SOD1, superoxide dismutase 1; TDP-43, TAR DNA-binding protein 43; UCHL1 null, ubiquitin carboxyterminal hydrolase 1 gene knockout; UMN, upper motor neurons; +, present; -, absent.

| model                    | gene copy number | disease onset (months) | life-span (months) | motor phenotype (tremor, muscle weakness) | paralysis (at the humane end-stage) | UMN loss | UMN deficits | LMN loss | LMN deficits | references                                                                                                          |
|--------------------------|------------------|------------------------|--------------------|-------------------------------------------|-------------------------------------|----------|--------------|----------|--------------|---------------------------------------------------------------------------------------------------------------------|
| SOD1 <sup>G93A</sup>     | 25               | 3                      | 4                  | +                                         | +                                   | +        | +            | +        | +            | ( <a href="#">Gurney et al., 1994</a> ; <a href="#">Chiu et al., 1995</a> ; <a href="#">Özdinler et al., 2011</a> ) |
| SOD1 <sup>G93A-low</sup> | 8-10             | 4-5                    | 8-8.5              | +                                         | +                                   | n.s.     | n.s.         | +        | +            | ( <a href="#">Acevedo-Arozena et al., 2011</a> )                                                                    |
| SOD1 <sup>G85R</sup>     | 0.2-1            | 8                      | 8.5                | +                                         | +                                   | n.s.     | n.s.         | +        | +            | ( <a href="#">Bruijn et al., 1997</a> )                                                                             |
| SOD1 <sup>G86R</sup>     | high/low         | 3-4                    | 4                  | +                                         | +                                   | n.s.     | n.s.         | +        | +            | ( <a href="#">Ripps et al., 1995</a> )                                                                              |
| SOD1 <sup>G37R</sup>     | 4-12             | 3-6                    | 7                  | +                                         | +                                   | n.s.     | n.s.         | +        | +            | ( <a href="#">Wong et al., 1995</a> )                                                                               |
| TDP-43 <sup>Q331K</sup>  | 1-1.5            | 3                      | > 24               | +                                         | +                                   | +        | +            | +        | +            | ( <a href="#">Arnold et al., 2013</a> ; <a href="#">Mitchell et al., 2015</a> )                                     |

|                            |      |       |         |   |      |      |      |   |      |                                                                                |
|----------------------------|------|-------|---------|---|------|------|------|---|------|--------------------------------------------------------------------------------|
| Prp-TDP43 <sup>A315T</sup> | n.a. | 3-4   | 4.5-5.7 | + | +    | +    | +    | + | +    | <a href="#">(Wegorzewska et al., 2009)</a>                                     |
| FUS <sup>P525L</sup>       | 4    | 1     | 12      | + | n.s. | n.s. | n.s. | + | n.s. | <a href="#">(Sharma et al., 2016)</a>                                          |
| FUS <sup>dNLS/+</sup>      | n.a. | 10    | >22     | + | -    | n.s. | n.s. | - | -    | <a href="#">(Scekic-Zahirovic et al., 2016; Scekic-Zahirovic et al., 2017)</a> |
| Alsin <sup>KO</sup>        | n.a. | 12    | >13     | - | -    | -    | +    | - | +    | <a href="#">(Deng et al., 2007; Gautam et al., 2016)</a>                       |
| UCHL1 null                 | n.a. | 2.2   | >6.6    | + | -    | +    | +    | - | +    | <a href="#">(Jara et al., 2015)</a><br><a href="#">(Genç et al., 2016)</a>     |
| hPFN1 <sup>G118V</sup>     | n.a. | 4-4.5 | 5.7-7.7 | + | +    | +    | +    | + | +    | <a href="#">(Fil et al., 2017)</a>                                             |
| Prp-PFN1 <sup>C71G</sup>   | n.a. | 4-5   | 6-8     | + | +    | -    | -    | + | +    | <a href="#">(Yang et al., 2016)</a>                                            |

## References

- Acevedo-Arozena, A., Kalmar, B., Essa, S., Ricketts, T., Joyce, P., Kent, R., et al. (2011). A comprehensive assessment of the SOD1G93A low-copy transgenic mouse, which models human amyotrophic lateral sclerosis. *Disease models & mechanisms* 4(5), 686–700. doi: 10.1242/dmm.007237.
- Arnold, E.S., Ling, S.-C., Huelga, S.C., Lagier-Tourenne, C., Polymenidou, M., Ditsworth, D., et al. (2013). ALS-linked TDP-43 mutations produce aberrant RNA splicing and adult-onset motor neuron disease without aggregation or loss of nuclear TDP-43. *Proceedings of the National Academy of Sciences* 110(8), E736. doi: 10.1073/pnas.1222809110.
- Brujin, L.I., Becher, M.W., Lee, M.K., Anderson, K.L., Jenkins, N.A., Copeland, N.G., et al. (1997). ALS-linked SOD1 mutant G85R mediates damage to astrocytes and promotes rapidly progressive disease with SOD1-containing inclusions. *Neuron* 18(2), 327–338. doi: 10.1016/s0896-6273(00)80272-x.
- Chiu, A.Y., Zhai, P., Dal Canto, M.C., Peters, T.M., Kwon, Y.W., Prattis, S.M., et al. (1995). Age-Dependent Penetrance of Disease in a Transgenic Mouse Model of Familial Amyotrophic Lateral Sclerosis. *Molecular and Cellular Neuroscience* 6(4), 349–362. doi: <https://doi.org/10.1006/mcne.1995.1027>.
- Deng, H.-X., Zhai, H., Fu, R., Shi, Y., Gorrie, G.H., Yang, Y., et al. (2007). Distal axonopathy in an alsin-deficient mouse model. *Human molecular genetics* 16(23), 2911–2920.
- Fil, D., DeLoach, A., Yadav, S., Alkam, D., MacNicol, M., Singh, A., et al. (2017). Mutant Profilin1 transgenic mice recapitulate cardinal features of motor neuron disease. *Hum Mol Genet* 26(4), 686–701. doi: 10.1093/hmg/ddw429.
- Gautam, M., Jara, J.H., Sekerkova, G., Yasvoina, M.V., Martina, M., and Özdinler, P.H. (2016). Absence of alsin function leads to corticospinal motor neuron vulnerability via novel disease mechanisms. *Human molecular genetics* 25(6), 1074–1087.
- Genç, B., Jara, J.H., Schultz, M.C., Manuel, M., Stanford, M.J., Gautam, M., et al. (2016). Absence of UCHL 1 function leads to selective motor neuropathy. *Annals of clinical and translational neurology* 3(5), 331–345. doi: 10.1002/acn3.298.
- Gurney, M.E., Pu, H., Chiu, A.Y., Dal Canto, M.C., Polchow, C.Y., Alexander, D.D., et al. (1994). Motor neuron degeneration in mice that express a human Cu,Zn superoxide dismutase mutation. *Science (New York, N.Y.)* 264(5166), 1772–1775. doi: 10.1126/science.8209258.
- Jara, J.H., Genç, B., Cox, G.A., Bohn, M.C., Roos, R.P., Macklis, J.D., et al. (2015). Corticospinal motor neurons are susceptible to increased ER stress and display profound degeneration in the absence of UCHL1 function. *Cerebral cortex* 25(11), 4259–4272.
- Mitchell, J.C., Constable, R., So, E., Vance, C., Scotter, E., Glover, L., et al. (2015). Wild type human TDP-43 potentiates ALS-linked mutant TDP-43 driven progressive motor and cortical neuron degeneration with pathological features of ALS. *Acta Neuropathol Commun* 3, 36. doi: 10.1186/s40478-015-0212-4.
- Özdinler, P.H., Benn, S., Yamamoto, T.H., Güzel, M., Brown, R.H., and Macklis, J.D. (2011). Corticospinal motor neurons and related subcerebral projection neurons undergo early and specific neurodegeneration in hSOD1G<sup>93</sup>A transgenic ALS mice. *The Journal of neuroscience : the official journal of the Society for Neuroscience* 31(11), 4166–4177. doi: 10.1523/jneurosci.4184-10.2011.
- Ripps, M.E., Huntley, G.W., Hof, P.R., Morrison, J.H., and Gordon, J.W. (1995). Transgenic mice expressing an altered murine superoxide dismutase gene provide an animal model of amyotrophic lateral sclerosis. *Proc Natl Acad Sci U S A* 92(3), 689–693. doi: 10.1073/pnas.92.3.689.

- Scekic-Zahirovic, J., Oussini, H.E., Mersmann, S., Drenner, K., Wagner, M., Sun, Y., et al. (2017). Motor neuron intrinsic and extrinsic mechanisms contribute to the pathogenesis of FUS-associated amyotrophic lateral sclerosis. *Acta neuropathologica* 133(6), 887-906. doi: 10.1007/s00401-017-1687-9.
- Scekic-Zahirovic, J., Sendscheid, O., El Oussini, H., Jambeau, M., Sun, Y., Mersmann, S., et al. (2016). Toxic gain of function from mutant FUS protein is crucial to trigger cell autonomous motor neuron loss. *The EMBO journal* 35(10), 1077-1097. doi: 10.15252/embj.201592559.
- Sharma, A., Lyashchenko, A.K., Lu, L., Nasrabad, S.E., Elmaleh, M., Mendelsohn, M., et al. (2016). ALS-associated mutant FUS induces selective motor neuron degeneration through toxic gain of function. *Nature communications* 7, 10465-10465. doi: 10.1038/ncomms10465.
- Wegorzewska, I., Bell, S., Cairns, N.J., Miller, T.M., and Baloh, R.H. (2009). TDP-43 mutant transgenic mice develop features of ALS and frontotemporal lobar degeneration. *Proceedings of the National Academy of Sciences* 106(44), 18809. doi: 10.1073/pnas.0908767106.
- Wong, P.C., Pardo, C.A., Borchelt, D.R., Lee, M.K., Copeland, N.G., Jenkins, N.A., et al. (1995). An adverse property of a familial ALS-linked SOD1 mutation causes motor neuron disease characterized by vacuolar degeneration of mitochondria. *Neuron* 14(6), 1105-1116. doi: 10.1016/0896-6273(95)90259-7.
- Yang, C., Danielson, E.W., Qiao, T., Metterville, J., Brown, R.H., Landers, J.E., et al. (2016). Mutant PFN1 causes ALS phenotypes and progressive motor neuron degeneration in mice by a gain of toxicity. *Proceedings of the National Academy of Sciences* 113(41), E6209. doi: 10.1073/pnas.1605964113.
