# Supplementary material for: Exciting Complexity: The Role of Motor Circuit Elements in ALS Pathophysiology
Source: PubMed Central journal article supplement (PMC7311855; doi:10.3389/fnins.2020.00573), 2020-06-17
Supplement: Table_2.pdf [file Table_2.pdf]

**Supplementary Table 2.** Summary of excitability changes of peripheral nerves in ALS patients. Abbreviations: asymp., asymptomatic; CMAP, compound muscle action potential; EMG, electromyography; fALS, familial ALS; FPs, fasciculation potentials; H'H ratio, H' response to the maximum H-reflex response; MUs, motor units; n.s., not specified; MUAP, muscle unit action potentials; NCS, nerve conduction studies; SOD1, superoxide dismutase 1; sALS, sporadic ALS; TE<sub>d</sub>, depolarizing threshold electrotonus; TE<sub>h</sub>, hyperpolarizing threshold electrotonus;  $\tau_{SD}$ , strength-duration constant.

| region            | ALS type                      | age (average) | method                                                                                                                       | finding                                                                                                                                                                                      | references                                                                                                                                                       |                                                 |
|-------------------|-------------------------------|---------------|------------------------------------------------------------------------------------------------------------------------------|----------------------------------------------------------------------------------------------------------------------------------------------------------------------------------------------|------------------------------------------------------------------------------------------------------------------------------------------------------------------|-------------------------------------------------|
| Peripheral nerves | sALS                          | 51 years      | NCS in median, sural and peroneal nerves; EMG of interosseus, biceps brachii, vastus lateralis and tibialis anterior muscles | hyperexcitability: FP $\uparrow$ , double discharging MUs $\uparrow$                                                                                                                         | ( <a href="#">Kostera-Pruszczyk et al., 2002</a> )                                                                                                               |                                                 |
|                   | sALS                          | 63 years      | NCS of median nerve and CMAP recordings of abductor pollicis brevis                                                          | CMAP $\downarrow$<br>axonal hyperexcitability: $\tau_{SD}$ $\uparrow$ (CMAP > 5 mV group), TE <sub>d</sub> $\uparrow$ , supernormality $\uparrow$                                            | ( <a href="#">Kanai et al., 2006</a> )                                                                                                                           |                                                 |
|                   |                               | 59.6 years    |                                                                                                                              | CMAP $\downarrow$<br>axonal hyperexcitability: $\tau_{SD}$ $\uparrow$ , TE <sub>d</sub> $\uparrow$ , TE <sub>h</sub> $\uparrow$<br>superexcitability $\uparrow$                              | ( <a href="#">Vucic and Kiernan, 2006</a> )                                                                                                                      |                                                 |
|                   | fALS                          | 58 years      | threshold tracking and current-threshold measurements of median nerve                                                        | CMAP $\downarrow$<br>axonal hyperexcitability: $\tau_{SD}$ $\uparrow$                                                                                                                        | ( <a href="#">Vucic and Kiernan, 2009</a> )                                                                                                                      |                                                 |
|                   | sALS                          | 59 years      |                                                                                                                              | axonal excitability $\leftrightarrow$ , $\tau_{SD}$ $\leftrightarrow$                                                                                                                        |                                                                                                                                                                  |                                                 |
|                   | fALS (asyp. SOD1)             | 40 years      |                                                                                                                              | axonal hyperexcitability (7 patients): TE <sub>d</sub> $\uparrow$<br>axonal hypoexcitability (4 patients): TE <sub>d</sub> $\downarrow$                                                      | ( <a href="#">Bostock et al., 1995</a> )                                                                                                                         |                                                 |
|                   | n.s.                          | n.s.          | 59.6 years                                                                                                                   | threshold tracking measurements of ulnar nerve                                                                                                                                               | axonal hyperexcitability: TE <sub>d</sub> $\uparrow$ , TE <sub>h</sub> $\uparrow$                                                                                | ( <a href="#">Horn et al., 1996</a> )           |
|                   |                               | n.s.          | n.s.                                                                                                                         | threshold tracking measurements of median nerve                                                                                                                                              | axonal hyperexcitability: TE <sub>d</sub> $\uparrow$ , TE <sub>h</sub> $\uparrow$                                                                                | ( <a href="#">Horn et al., 1996</a> )           |
|                   |                               | n.s.          | 59.1 years                                                                                                                   | NCS of median nerve and CMAP recordings of abductor pollicis brevis; threshold tracking of median nerve                                                                                      | CMAP $\downarrow$<br>axonal hyperexcitability: $\tau_{SD}$ $\uparrow$ , rheobase $\downarrow$                                                                    | ( <a href="#">Mogyoros et al., 1998</a> )       |
|                   |                               | n.s.          | 64 years                                                                                                                     | NCS of median nerve and CMAP recordings of abductor pollicis brevis                                                                                                                          | CMAP $\downarrow$ , conduction velocity $\downarrow$                                                                                                             | ( <a href="#">Tamura et al., 2006</a> )         |
|                   |                               | n.s.          |                                                                                                                              | latent addition with threshold tracking of the median nerve                                                                                                                                  | axonal hyperexcitability: nodal persistent Na <sup>+</sup> conductance $\uparrow$ , TE <sub>d</sub> $\uparrow$                                                   |                                                 |
|                   |                               | n.s.          | 66 years                                                                                                                     | NCS of median nerve and CMAP recordings of abductor pollicis brevis; threshold tracking of median nerve at wrist (nerve trunk) and at abductor pollicis brevis (distal axons)                | CMAP $\downarrow$<br>axonal hyperexcitability: TE <sub>d</sub> $\uparrow$ , TE <sub>d</sub> $\uparrow$ (distal axons) > TE <sub>d</sub> $\uparrow$ (nerve trunk) | ( <a href="#">Nakata et al., 2006</a> )         |
|                   |                               | n.s.          | 54.7 years                                                                                                                   | single MUAP recordings of the brachial biceps                                                                                                                                                | hyperexcitability: double discharge firing MUs $\uparrow$                                                                                                        | ( <a href="#">Piotrkiewicz et al., 2008</a> )   |
|                   |                               | n.s.          | 64.0 years                                                                                                                   | EMG of tibialis anterior                                                                                                                                                                     | hyperexcitability: complex FPs $\uparrow$                                                                                                                        | ( <a href="#">de Carvalho and Swash, 2013</a> ) |
|                   | n.s.                          | 46.3 years    | soleus H-reflex measurement with EMG                                                                                         | recurrent inhibition $\downarrow$ , H'/H ratio $\downarrow$                                                                                                                                  | ( <a href="#">Raynor and Shefner, 1994</a> )                                                                                                                     |                                                 |
|                   | Riluzole treated ALS patients | 54 years      | threshold tracking and single MUAP recordings of the abductor pollicis brevis and abductor digiti minimi                     | CMAP $\downarrow$<br>axonal hypoexcitability: rheobase $\uparrow$ , threshold for single MU $\uparrow$ , axonal hyperexcitability: TE <sub>d</sub> $\uparrow$ , superexcitability $\uparrow$ | ( <a href="#">Howells et al., 2018</a> )                                                                                                                         |                                                 |

## References

- Bostock, H., Sharief, M.K., Reid, G., and Murray, N.M. (1995). Axonal ion channel dysfunction in amyotrophic lateral sclerosis. *Brain* 118 ( Pt 1), 217-225. doi: 10.1093/brain/118.1.217.
- de Carvalho, M., and Swash, M. (2013). Fasciculation potentials and earliest changes in motor unit physiology in ALS. *J Neurol Neurosurg Psychiatry* 84(9), 963-968. doi: 10.1136/jnnp-2012-304545.
- Horn, S., Quasthoff, S., Grafe, P., Bostock, H., Renner, R., and Schrank, B. (1996). Abnormal axonal inward rectification in diabetic neuropathy. *Muscle Nerve* 19(10), 1268-1275. doi: 10.1002/mus.880191002.
- Howells, J., Matamala, J.M., Park, S.B., Garg, N., Vucic, S., Bostock, H., et al. (2018). In vivo evidence for reduced ion channel expression in motor axons of patients with amyotrophic lateral sclerosis. *The Journal of physiology* 596(22), 5379-5396. doi: 10.1113/JP276624.
- Kanai, K., Kuwabara, S., Misawa, S., Tamura, N., Ogawara, K., Nakata, M., et al. (2006). Altered axonal excitability properties in amyotrophic lateral sclerosis: impaired potassium channel function related to disease stage. *Brain* 129(4), 953-962. doi: 10.1093/brain/awl024.
- Kostera-Pruszczyk, A., Niebroj-Dobosz, I., Emeryk-Szajewska, B., Karwanska, A., and Rowinska-Marcinska, K. (2002). Motor unit hyperexcitability in amyotrophic lateral sclerosis vs amino acids acting as neurotransmitters. *Acta Neurol Scand* 106(1), 34-38. doi: 10.1034/j.1600-0404.2002.00149.x.
- Mogyoros, I., Kiernan, M.C., Burke, D., and Bostock, H. (1998). Strength-duration properties of sensory and motor axons in amyotrophic lateral sclerosis. *Brain* 121 ( Pt 5), 851-859. doi: 10.1093/brain/121.5.851.
- Nakata, M., Kuwabara, S., Kanai, K., Misawa, S., Tamura, N., Sawai, S., et al. (2006). Distal excitability changes in motor axons in amyotrophic lateral sclerosis. *Clinical Neurophysiology* 117(7), 1444-1448. doi: <https://doi.org/10.1016/j.clinph.2006.04.005>.
- Piotrkiewicz, M., Kudina, L., Mierzejewska, J., and Hausmanowa-Petrusewicz, I. (2008). Analysis of double discharges in amyotrophic lateral sclerosis. *Muscle Nerve* 38(1), 845-854. doi: 10.1002/mus.20997.
- Raynor, E.M., and Shefner, J.M. (1994). Recurrent inhibition is decreased in patients with amyotrophic lateral sclerosis. *Neurology* 44(11), 2148-2153. doi: 10.1212/wnl.44.11.2148.
- Tamura, N., Kuwabara, S., Misawa, S., Kanai, K., Nakata, M., Sawai, S., et al. (2006). Increased nodal persistent Na<sup>+</sup> currents in human neuropathy and motor neuron disease estimated by latent addition. *Clinical Neurophysiology* 117(11), 2451-2458. doi: <https://doi.org/10.1016/j.clinph.2006.07.309>.
- Vucic, S., and Kiernan, M.C. (2006). Axonal excitability properties in amyotrophic lateral sclerosis. *Clinical Neurophysiology* 117(7), 1458-1466. doi: <https://doi.org/10.1016/j.clinph.2006.04.016>.
- Vucic, S., and Kiernan, M.C. (2009). Upregulation of persistent sodium conductances in familial ALS. *Journal of Neurology, Neurosurgery & Psychiatry* 81(2), 222-227. doi: 10.1136/jnnp.2009.183079.
